# Supplementary material for: Biological invasions alter environmental microbiomes: A meta-analysis
Source: PLOS journal article supplement (doi:10.1371/journal.pone.0240996), 2020-10-22
Supplement: S4 (10.1371/journal.pone.0240996.s004) [file redirect.do]

# Biological invasions alter environmental microbiomes: a meta-analysis

Antonino Malacrinò, Victoria A. Sadowski, Tvisha K. Martin, Nathalia Cavichioli de Oliveira, Ian J. Brackett, James D. Feller, Kristian J. Harris, Orlando Combata Heredia, Rosa Vescio, Alison E. Bennett

**S3 Table.** Comparison of two different PERMANOVA models testing the effect of biological *sample type* (invaded or control), *organism* (plant, mammal, mussel), and their interactions, on the structure of the environmental microbiome. In Model 1 we included *studyID* and *speciesID* as stratification factor, while in Model 2 we included *studyID*, *speciesID* and *environment* (soil or water) as stratification factors.

|                                                                                                      |                      |          |          |
|------------------------------------------------------------------------------------------------------|----------------------|----------|----------|
| <b>Model 1</b><br>~ Sample_type * Organism_group, strata = c("Study_ID", "Species_ID")               |                      |          |          |
|                                                                                                      | <b>R<sup>2</sup></b> | <b>F</b> | <b>P</b> |
| <i>Sample_type</i>                                                                                   | 0.011                | 6.68     | <0.001   |
| <i>Organism_group</i>                                                                                | 0.411                | 118.86   | <0.001   |
| <i>Sample_type</i> * <i>Organism_group</i>                                                           | 0.007                | 2.1      | 0.01     |
| <b>Model 2</b><br>~ Sample_type * Organism_group, strata= c("Study_ID", "Environment", "Species_ID") |                      |          |          |
|                                                                                                      | <b>R<sup>2</sup></b> | <b>F</b> | <b>P</b> |
| <i>Sample_type</i>                                                                                   | 0.011                | 6.68     | <0.001   |
| <i>Organism_group</i>                                                                                | 0.411                | 118.86   | <0.001   |
| <i>Sample_type</i> * <i>Organism_group</i>                                                           | 0.007                | 2.1      | 0.02     |
